# Supplementary material
Source: MDPI journal article supplement (https://www.mdpi.com/2311-7524/8/10/874)
Supplement: s1 [file s1]

## Supplementary Materials

### Supplementary Figures

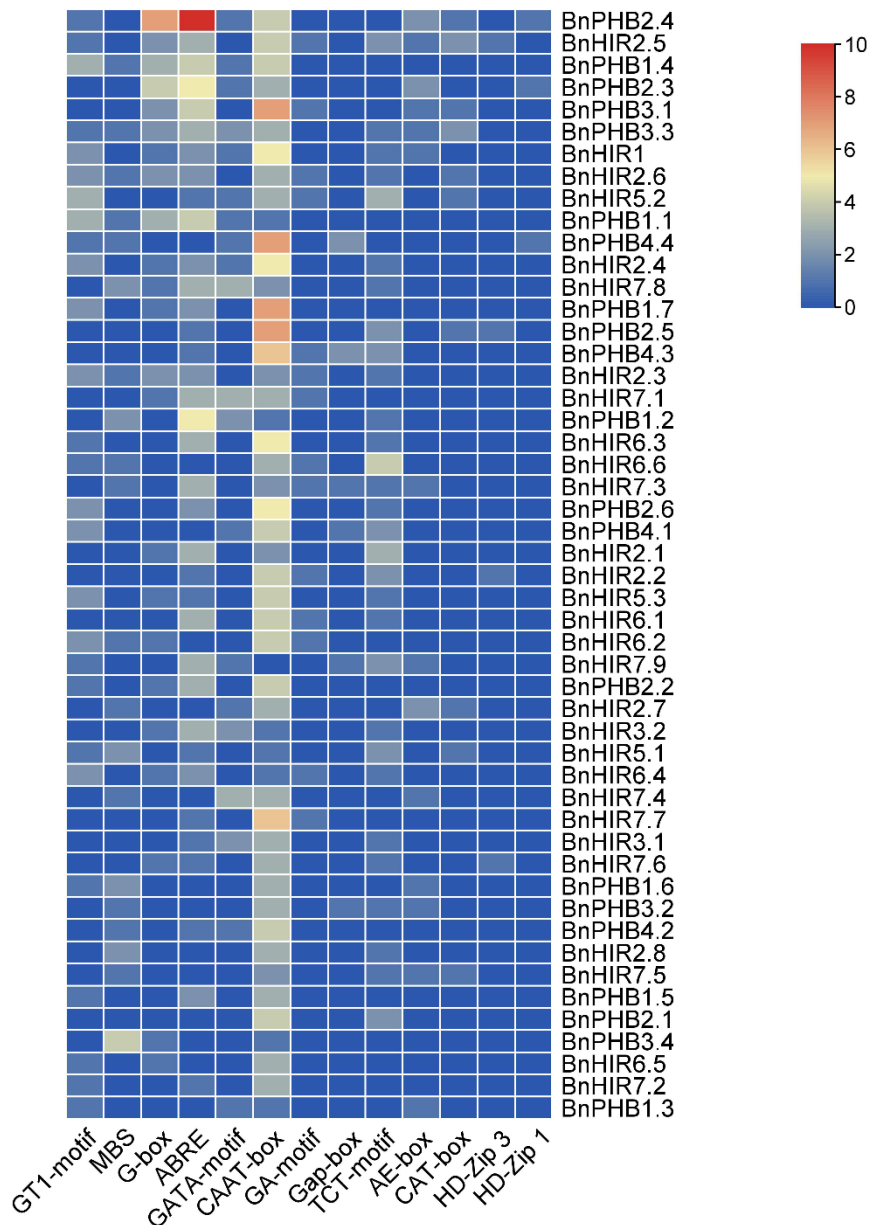

**Figure S1.** Statistics of *cis*-acting elements in the *BnHIR* promoter region. The distribution of *cis*-acting elements of different genes is shown in the figure. *Cis*-acting elements in promoter regions were predicted using PlantCARE (<http://bioinformatics.psb.ugent.be/webtools/plantcare/html/>) and plotted by TBtools.

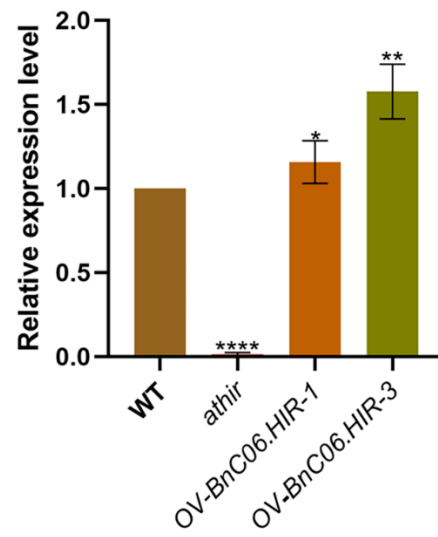

**Figure S2.** Relative expression level of *Arabidopsis* transgenic lines. Relative expression levels of wild type, *Athir2.7-Mu* mutant line, *OV-BnHIR2.7-1* and *OV-BnHIR2.7-3* lines.

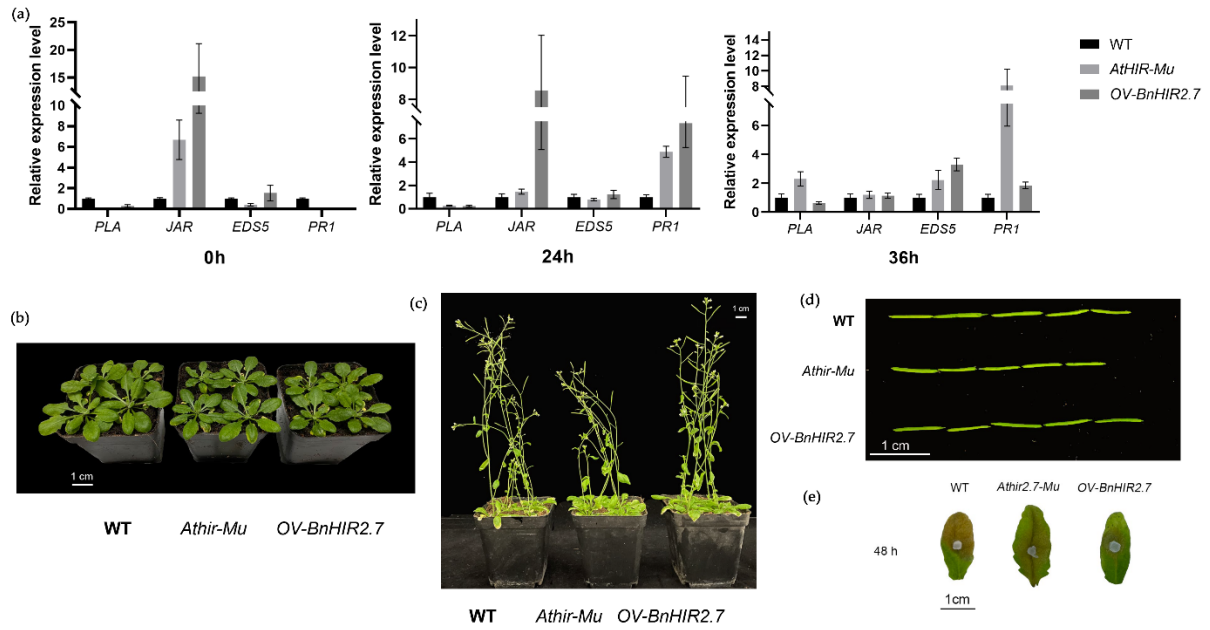

**Figure S3.** Phenotype comparison of wild type, Athir2.7-Mu, and OV-BnHIR2.7 lines. (a) The expression levels of SA and JA pathway marker genes in each time period after *S. sclerotiorum* inoculation. (b) *Arabidopsis* at the seedling stage. (c) Flowering time and plant height 40 d after germination. (d) Length of silique from the middle main inflorescence 20 d after flowering. (e) Leaves of *Arabidopsis* 48 hours after inoculation with *S. sclerotiorum*.

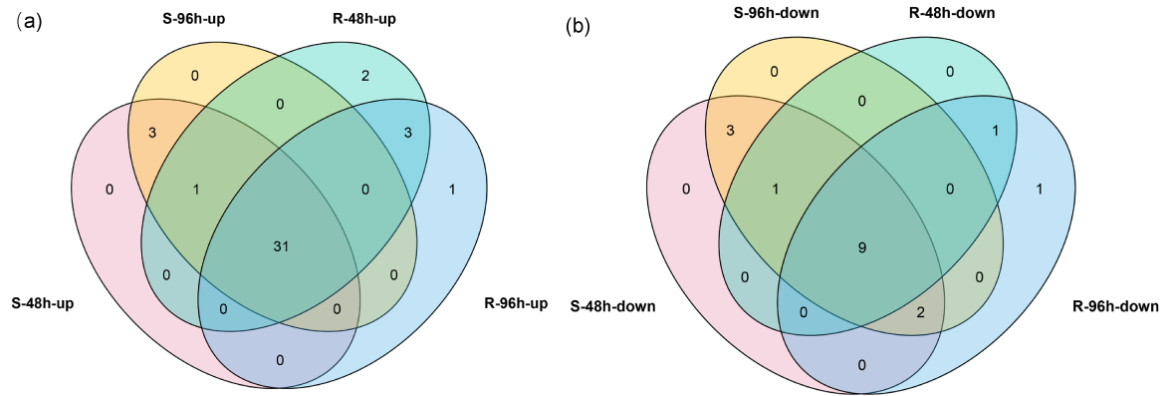

**Figure S4.** Venn diagram of changes in *HIR* gene expression after inoculation of *Sclerotinia sclerotiorum* (a) Venn diagram of up-regulated *HIR* genes. (b) Venn diagram of down-regulated *HIR* genes. Changes in gene expression were calculated according to the control group of the material, and the figure was plotted using TBtools.

**Table S1.** Primers used in this study

| Primer name     | Sequences                       |
|-----------------|---------------------------------|
| OV-BnHIR2.7-F   | 5'-ATGGGTCAAGTTTTAGGATGTGTCC-3' |
| OV-BnHIR2.7-R   | 5'-TCAGGGAAACGCTGCTGCTGAGTAA-3' |
| F35S3ND         | 5'-GGAAGTTCATTTTCATTTGGAGAG-3'  |
| OCS5ND          | 5'-CGATCATAGGCGTCTCGCATATCTC-3' |
| Athir2.7-LP     | 5'-AAGAAAATTTTGTTCAGAAAAAGAG-3' |
| Athir2.7-RP     | 5'-ATACAACCCAAAGCTTGACCC-3'     |
| LBb1.3          | 5'-ATTTTGCCGATTTCGGAAC-3'       |
| M13F            | 5'-TGTAACACGACGGCCAGT-3'        |
| M13R            | 5'-CAGGAAACAGCTATGACC-3'        |
| AtHIR2.7-qPCR-F | 5'-ACTTTTGGGAAATTCGACGAAG-3'    |
| AtHIR2.7-qPCR-R | 5'-GAACACGTAAAGAAAGGTGACC-3'    |
| BnHIR2.7-qPCR-F | 5'-AGGCTATGTTCGCATTACGGG-3'     |
| BnHIR2.7-qPCR-R | 5'-CTTGTCTCTGGCGGGCAATA-3'      |
| Athir2.7-qPCR-F | 5'- ACTTTTGGGAAATTCGACGAAG-3'   |
| Athir2.7-qPCR-R | 5'-GAACACGTAAAGAAAGGTGACC-3'    |
| AtPR1-qPCR-F    | 5'-TGGTCACTACACTCAAGTTGTT-3'    |
| AtPR1-qPCR-R    | 5'-GCTTCTCGTTCACATAATTCCC-3'    |
| AtEDS5-qPCR-F   | 5'-TAATCTTCCCAAGGCTAGAACG-3'    |
| AtEDS5-Qpcr-R   | 5'-CGCCATGAAGAAAGGTATAAGC-3'    |
| Actin7-F        | 5'-TGGGTTTGCTGGTGACGAT-3'       |
| Actin7-R        | 5'-TGCCTAGGACGACCAACAATACT-3'   |
